# Supplementary material for: Computational design of prefusion-stabilized Herpesvirus gB trimers
Source: PubMed Central journal article supplement (PMC11526958; doi:10.1101/2024.10.23.619923), 2024-10-24
Supplement: NIHPP2024.10.23.619923v1-supplement-1.pdf [file NIHPP2024.10.23.619923v1-supplement-1.pdf]

\*most side-chains not built in model reducing reliability of EMRinger score and model resolution calculation

**Table S3. Cryo-EM data collection, refinement and validation statistics for SARS-CoV-2 S 2P oP3h constructs.**

|                                                     | SARS-CoV-2 S 2P<br>oP3h (3X RINEIER) |              | SARS-CoV-2 S 2P<br>oP3h (4X RINALET) |              |
|-----------------------------------------------------|--------------------------------------|--------------|--------------------------------------|--------------|
| <b>Data collection and processing</b>               |                                      |              |                                      |              |
| Magnification (nominal)                             | 45,000                               |              | 45,000                               |              |
| Voltage (kV)                                        | 200                                  |              | 200                                  |              |
| Electron exposure (e <sup>-</sup> /Å <sup>2</sup> ) | 47                                   |              | 47                                   |              |
| Defocus range (µm)                                  | 0.3-2.0                              |              | 0.3-2.0                              |              |
| Pixel size (Å)                                      | 0.89                                 |              | 0.89                                 |              |
| Processing Type                                     | Global                               | Local (oP3h) | Global                               | Local (oP3h) |
| Symmetry imposed                                    | C3                                   |              | C3                                   |              |
| Initial particle images (no.)                       | 59,434                               | 34,709       | 120,164                              | 86,822       |
| Final particle images (no.)                         | 34,709                               | 34,709       | 86,822                               | 86,822       |
| Map resolution (Å)                                  | 3.4                                  | 3.6          | 2.8                                  | 3.1          |
| FSC threshold                                       | 0.143                                | 0.143        | 0.143                                | 0.143        |
| Map sharpening <i>B</i> factor (Å <sup>2</sup> )    | -85                                  | -110         | -85                                  | -144         |
| <b>Model Refinement</b>                             |                                      |              |                                      |              |
| Initial model used (PDB code)                       | 7LXY                                 |              | 7LXY                                 |              |
| Model resolution (Å)                                | 4.3                                  | 4.2          | 2.9                                  | 3.9          |
| FSC threshold                                       | 0.5                                  | 0.5          | 0.5                                  | 0.5          |
| Model composition                                   |                                      |              |                                      |              |
| Nonhydrogen atoms                                   | 18,594                               | 558          | 20,025                               | 759          |
| Protein residues                                    | 2,658                                | 75           | 2,811                                | 96           |
| Glycan residues                                     | 42                                   | 0            | 42                                   | 0            |
| <i>B</i> factors (Å <sup>2</sup> )                  |                                      |              |                                      |              |
| Protein                                             | 33                                   | 33           | 31                                   | 19           |
| Glycans                                             | 36                                   | -            | 29                                   | -            |
| R.m.s. deviations                                   |                                      |              |                                      |              |
| Bond lengths (Å)                                    | 0.01                                 | 0.01         | 0.01                                 | 0.01         |
| Bond angles (°)                                     | 1.0                                  | 0.9          | 1.0                                  | 0.8          |
| <b>Model Validation</b>                             |                                      |              |                                      |              |
| MolProbity score                                    | 0.9                                  | 0.5          | 0.9                                  | 0.9          |
| Clashscore                                          | 1.3                                  | 0.0          | 1.4                                  | 1.9          |
| Rotamer outliers (%)                                | 0.4                                  | 0.0          | 0.5                                  | 0.0          |
| Ramachandran plot                                   |                                      |              |                                      |              |
| Favored (%)                                         | 98                                   | 100          | 98                                   | 100          |
| Allowed (%)                                         | 2                                    | 0            | 2                                    | 0            |
| Outliers (%)                                        | 0                                    | 0            | 0                                    | 0            |
| EMRinger score                                      | 1.4                                  | 0.7          | 4.6                                  | 4.1          |
| <b>Data Availability</b>                            |                                      |              |                                      |              |
| EMDB                                                | XXXX                                 | XXXX         | XXXX                                 | XXXX         |
| PDB                                                 | XXXX                                 | XXXX         | XXXX                                 | XXXX         |

**Table S4. Cryo-EM data collection, refinement and validation statistics for CMV, HHV6B, HSV1, and VZV gB constructs.**

|                                                     | CMV gB-deliDoP<br>I5350A2a |                        | HHV6B gB-deliDoP<br>I5350A2a |        | HSV1 gB-deliD     |                 | VZV gB-<br>deliD |
|-----------------------------------------------------|----------------------------|------------------------|------------------------------|--------|-------------------|-----------------|------------------|
| <b>Data collection and processing</b>               |                            |                        |                              |        |                   |                 |                  |
| Magnification (nominal)                             | 130,000                    |                        | 130,000                      |        | 45,000            |                 | 130,000          |
| Voltage (kV)                                        | 300                        |                        | 300                          |        | 200               |                 | 300              |
| Electron exposure (e <sup>-</sup> /Å <sup>2</sup> ) | 63                         |                        | 63                           |        | 47                |                 | 63               |
| Defocus range (µm)                                  | 0.3-2.0                    |                        | 0.3-2.0                      |        | 0.3-2.0           |                 | 0.3-2.0          |
| Pixel size (Å)                                      | 0.829                      |                        | 0.829                        |        | 0.89              |                 | 0.843            |
| Processing Type                                     | Global                     | Local<br>gB DII-<br>DV | Global                       | Global | Local<br>(closed) | Local<br>(open) | Global           |
| Symmetry imposed                                    | C1                         | C3                     | C3                           | C3     | C3                | C3              | C3               |
| Initial particle images (no.)                       | 51,511                     | 33,533                 | 85,490                       | 67,753 | 138,213           | 138,213         | 251,305          |
| Final particle images (no.)                         | 33,533                     | 33,533                 | 67,753                       | 67,753 | 43,635            | 40,021          | 48,271           |
| Map resolution (Å)                                  | 6.2                        | 5.8                    | 4.3                          | 4.6    | 5.8               | 6.3             | 2.9              |
| FSC threshold                                       | 0.143                      | 0.143                  | 0.143                        | 0.143  | 0.143             | 0.143           | 0.143            |
| Map sharpening B factor (Å <sup>2</sup> )           | -461                       | -455                   | -113                         | -251   | -362              | -442            | -96              |
| <b>Model Refinement</b>                             |                            |                        |                              |        |                   |                 |                  |
| Initial model used (PDB code)                       | 7KDP                       |                        | 7KDP                         |        | 6Z9M              |                 | 7K1S             |
| Model resolution (Å)                                | 7.9*                       | 7.2*                   | 4.5*                         | 6.7*   | 8.4*              | 8.4*            | 3.3              |
| FSC threshold                                       | 0.5                        | 0.5                    | 0.5                          | 0.5    | 0.5               | 0.5             | 0.5              |
| Model composition                                   |                            |                        |                              |        |                   |                 |                  |
| Nonhydrogen atoms                                   | 13,049                     | 5,802                  | 10,055                       | 2,747  | 8,451             | 8,538           | 25,656           |
| Protein residues                                    | 2,482                      | 1086                   | 1920                         | 507    | 1650              | 1,632           | 3,342            |
| Glycan residues                                     | 33                         | 21                     | 25                           | 12     | 6                 | 18              | 18               |
| B factors (Å <sup>2</sup> )                         |                            |                        |                              |        |                   |                 |                  |
| Protein                                             | 200                        | 122                    | 300                          | 101    | 197               | 196             | 22               |
| Glycans                                             | 233                        | 117                    | 388                          | 100    | 202               | 217             | 25               |
| R.m.s. deviations                                   |                            |                        |                              |        |                   |                 |                  |
| Bond lengths (Å)                                    | 0.01                       | 0.01                   | 0.01                         | 0.01   | 0.01              | 0.01            | 0.01             |
| Bond angles (°)                                     | 1.02                       | 0.96                   | 1.09                         | 1.02   | 0.98              | 1.09            | 0.95             |
| <b>Model Validation</b>                             |                            |                        |                              |        |                   |                 |                  |
| MolProbity score                                    | 0.6                        | 0.8                    | 0.8                          | 0.7    | 1.3               | 1.2             | 0.9              |
| Clashscore                                          | 0.4                        | 0.7                    | 1.1                          | 0.7    | 1.3               | 1.7             | 1.6              |
| Rotamer outliers (%)                                | 0.0                        | 0.0                    | 0.0                          | 0.0    | 2.6               | 2.4             | 0.5              |
| Ramachandran plot                                   |                            |                        |                              |        |                   |                 |                  |
| Favored (%)                                         | 98                         | 98                     | 98                           | 99     | 99                | 99              | 99               |
| Allowed (%)                                         | 2                          | 2                      | 2                            | 1      | 1                 | 1               | 1                |
| Outliers (%)                                        | 0                          | 0                      | 0                            | 0      | 0                 | 0               | 0                |
| EMRinger score                                      | N/A*                       | N/A*                   | N/A*                         | N/A*   | N/A*              | N/A*            | 4.6              |
| <b>Data Availability</b>                            |                            |                        |                              |        |                   |                 |                  |
| EMDB                                                | XXXX                       | XXXX                   | XXXX                         | XXXX   | XXXX              | XXXX            | XXXX             |
| PDB                                                 | XXXX                       | XXXX                   | XXXX                         | XXXX   | XXXX              | XXXX            | XXXX             |

\*most side-chains not built in model reducing reliability of EMRinger score and model resolution calculation
